# Supplementary material for: Index markers of chronic fatigue syndrome with dysfunction of TCA and urea cycles
Source: PubMed Central journal article supplement (PMC5057083; doi:10.1038/srep34990), 2016-10-11
Supplement: srep34990-s1.pdf [file srep34990-s1.pdf]

Supplementary Information for

**Index markers of chronic fatigue syndrome with dysfunction of TCA and urea cycles**

Emi Yamano, Masahiro Sugimoto, Akiyoshi Hirayama, Satoshi Kume, Masanori Yamato,

Guanghua Jin, Seiki Tajima, Nobuhito Goda, Kazuhiro Iwai, Sanae Fukuda, Koji Yamaguti,

Hirohiko Kuratsune, Tomoyoshi Soga, Yasuyoshi Watanabe, Yosky Kataoka \*

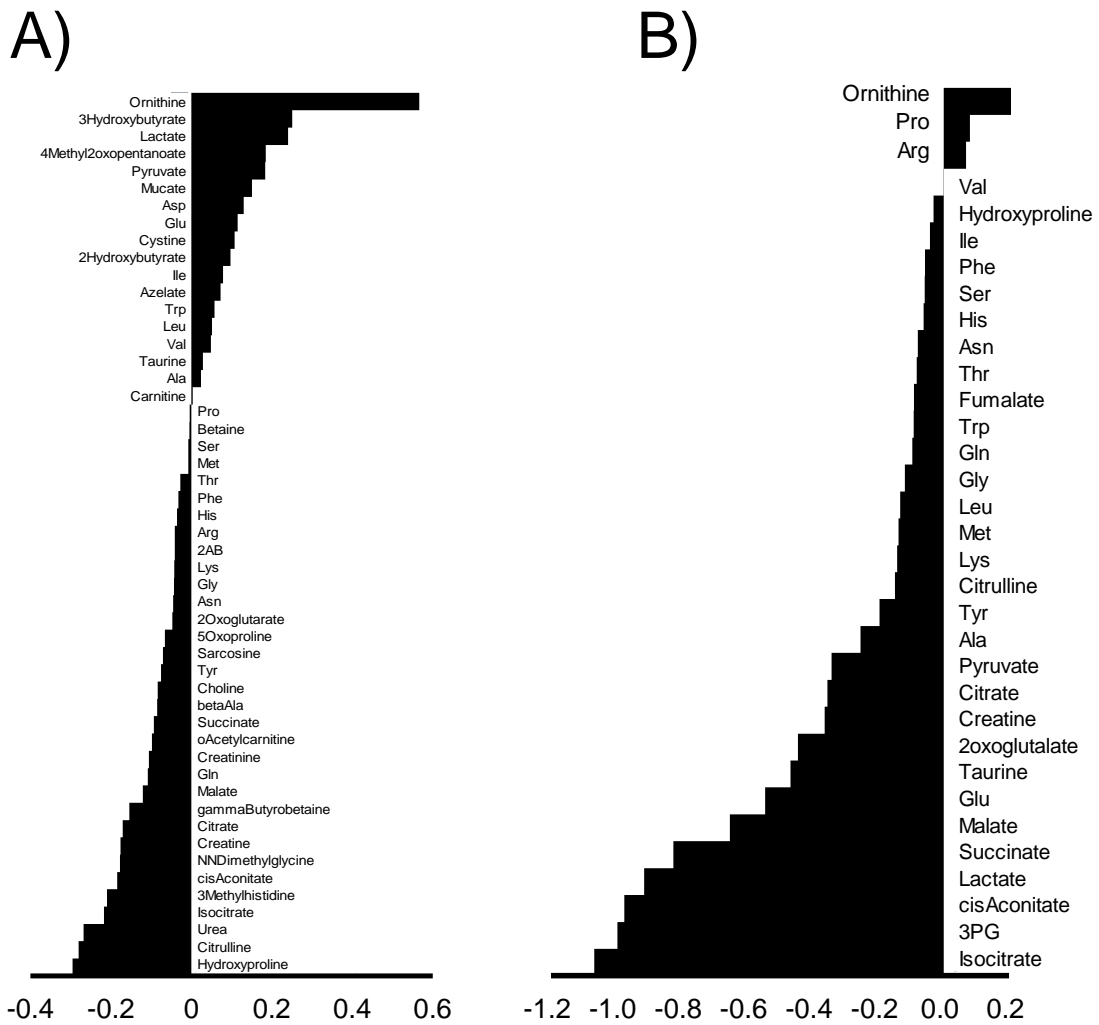

**Figure S1.** Log<sub>2</sub> fold changes of the mean concentration between CFS patients and healthy controls for training data **A)** and validation data **B)**.

**Table S1** Comparisons of glucose and representative metabolite concentrations between CFS patients and healthy controls in the training cohort.

| Name                  | Healthy controls |        | CFS patients |        | <i>P</i> value | Corrected<br><i>P</i> value |
|-----------------------|------------------|--------|--------------|--------|----------------|-----------------------------|
|                       | Mean             | SD     | Mean         | SD     |                |                             |
| Glucose               | 85.57            | 7.65   | 87.00        | 5.93   | 0.52           | 0.59                        |
| Pyruvate              | 130.43           | 30.52  | 148.16       | 47.27  | 0.087          | 0.16                        |
| Lactate               | 1375.06          | 394.35 | 1624.85      | 839.54 | 0.49           | 0.59                        |
| Citrate               | 183.63           | 40.98  | 163.10       | 36.03  | 0.010          | <b>0.049</b>                |
| <i>cis</i> -Aconitate | 9.74             | 3.15   | 8.57         | 2.64   | 0.080          | 0.16                        |
| 2-Oxoglutarate        | 23.13            | 5.38   | 22.39        | 5.17   | 0.63           | 0.63                        |
| Succinate             | 13.24            | 4.05   | 12.41        | 3.59   | 0.30           | 0.46                        |
| Malate                | 12.00            | 3.01   | 11.04        | 3.16   | 0.047          | 0.12                        |
| Arg                   | 94.31            | 23.98  | 91.64        | 30.66  | 0.39           | 0.54                        |
| Urea                  | 2426.33          | 622.12 | 2015.10      | 686.34 | 0.0010         | <b>0.012</b>                |
| Ornithine             | 52.15            | 16.36  | 77.25        | 42.24  | 0.023          | 0.083                       |
| Citrulline            | 38.50            | 11.91  | 31.70        | 8.31   | 0.0030         | <b>0.026</b>                |
| Glu                   | 37.59            | 13.71  | 40.71        | 17.38  | 0.55           | 0.59                        |
| Gln                   | 917.43           | 218.58 | 851.15       | 178.37 | 0.16           | 0.27                        |

The unit of glucose is mg/dl; the others are  $\mu\text{M}$ .

Mann–Whitney *U*-test was performed.

Significant corrected *P* values with a false discovery rate ( $P < 0.05$ ) are in bold type.

SD, standard deviation.

**Table S2.** Ranking using SVM-FS

| Rank | Metabolite            |
|------|-----------------------|
| 1    | Ornithine             |
| 2    | Citrulline            |
| 3    | Lactate               |
| 4    | Isocitrate            |
| 5    | Pyruvate              |
| 6    | Succinate             |
| 7    | Hydroxyproline        |
| 8    | Taurine               |
| 9    | Tyr                   |
| 10   | Val                   |
| 11   | Gln                   |
| 12   | Citrate               |
| 13   | Trp                   |
| 14   | Ala                   |
| 15   | Glu                   |
| 16   | Leu                   |
| 17   | Phe                   |
| 18   | Creatine              |
| 19   | Ile                   |
| 20   | Arg                   |
| 21   | Thr                   |
| 22   | <i>cis</i> -Aconitate |
| 23   | Pro                   |
| 24   | 2-Oxoglutarate        |
| 25   | Gly                   |
| 26   | Malate                |
| 27   | His                   |
| 28   | Lys                   |
| 29   | Ser                   |
| 30   | Asn                   |
| 31   | Met                   |

SVM-FS; Support vector machine–feature selection.
